# Supplementary material for: Transient hypothyroidism favors oligodendrocyte generation providing functional remyelination in the adult mouse brain
Source: eLife. 2017 Sep 6;6:e29996. doi: 10.7554/eLife.29996 (PMC5779229; doi:10.7554/eLife.29996)
Supplement: Figure 2—source data 1. [file elife-29996-fig2-data1.xlsx]

## Sheet: Feuil1
Hypothyroidism during demyelination induces functional recovery of myelinated axons.
Figure 2C		DATA_STD Amplitud
		CTL										Eu CPZ													Hypo CPZ
	N	1	2	3	4	5	6	7	8	9	10	1	2	3	4	5	6	7	8	9	10	11	12	13	1	2	3	4	5	6	7	8	9	10	11	12	13	14
	Stimuli (V)
	20	0.376132	0.939331	0.355438	0.410593	0.473958	0.338903	0.214835	0.4903	0.346965	0.314686	0.370427	0.453764	0.325147	0.334671	0.252064	0.303669	0.241675	0.221143	0.342207	0.360306	0.414522	0.412134	0.240897	0.33474	0.385476	0.484623	0.143745	0.286827	0.238178	0.368124	0.4013	0.358997	0.30603	0.00469934	0.524435	0.517817	0.283793
	40	0.74172	1.31758	0.687209	0.690373	0.886773	0.733286	0.377347	1.29313	0.69162	0.63019	1.03682	0.805401	0.649182	0.638273	0.680347	0.624309	0.57521	0.632485	0.736631	0.676355	0.837103	0.694734	0.589172	0.705466	0.729505	0.824008	0.471727	0.695584	0.43296	0.734116	0.744377	0.655401	0.677991	0.674355	0.854504	0.939562	0.675755
	60	1	1	1	1	1	1	1	1	1	1	1	1	1	1	1	1	1	1	1	1	1	1	1	1	1	1	1	1	1	1	1	1	1	1	1	1	1
							Two way ANOVA
							n=10, 13, 14
							p=0.0792
							F(2,102)=2.60
Figure 2E		CTL	Eu CPZ	Hypo CPZ				Figure 2F		CTL	Eu CPZ	Hypo CPZ
		0.828581	0.468244	1.00139						0.191651	0.256209	1
		1.38828	0.259762	0.999476						0.208581	0.197127	1
		0.610167	0	0.656779						0.535181	0	0.498438
		1.21006	0	1.29663						0.300687	0	0.499753
		1.42326	0.229816	0.818351						1	0.194457	0.359486
		0.544063	0.204825	0.928294						1	0.666083	0.537884
		0.740446	0.333637	0.984725						0.349491	0.263286	0.117884
		0.822893	0.279922	1.29733						0.467922	0.405021	0.0356374
		1.63927	0.236534	1.36966						0.227666	0.215525	0.231005
		0.998781	0.764393	0.506196						0.443097	0.260575	0.318475
		1.35219	2.29709	0.9269						1	0.206044	0.932549
		1.27141	0.674683	0.696905						1	0.278823	0.938693
		0.549735	0	0.667254						0.713061	0	0.732423
		1.27127	0	0.939548						0.893558	0	0.71455
		1.40797	1.09947	1.33313						0.677213	0.486015	1
		2.39733	0.538214	0.526137						0.446322	0.17437	1
		1.40939	0.443028	1.41437						0.253391	0.216079	0.169057
		1.21882	0.54828	1.42571						0.346988	0.164851	0.272363
		0.792853	0.466088	1.18968						0.513371	0.255746	0.274526
			0.394637	0.77354						0.456799	0.23763	0.320517
			0.425735	0.449009						0.948707	0.456114	0.194465
			0.57497	0.543225						0.381826	0.462981	0.210666
			0.460973	1.3368						0.60678	0.278017	0.300756
			0.426284	1.54202						0.545554	0.301902	0.451722
			1.08003							1	0.400545	0.25136
			0.891876							1	0.379874	0.370108
												0.286653
												0.593898
		Kruskal-Wallis Test								Kruskal-Wallis Test
		n=10, 13, 14								n=10, 13, 14
		P value P<0,0001								P value P=0,0001
