# Supplementary material for: Transient hypothyroidism favors oligodendrocyte generation providing functional remyelination in the adult mouse brain
Source: eLife. 2017 Sep 6;6:e29996. doi: 10.7554/eLife.29996 (PMC5779229; doi:10.7554/eLife.29996)
Supplement: Figure 3—source data 1. [file elife-29996-fig3-data1.xlsx]

## Sheet: Feuil1
T3/TRα1 signaling is excluded from the oligodendroglial lineage and represses EGFR expression in adult SVZ.
							WT		mut
	NaCl	T3/T4					NaCl	T3	NaCl	T3
Figure 3E	1.106	0.909				Figure 3F	3806	3153	2245	3750
	1.084	0.547					2398	2101	2923	445
	0.835	0.743					4034	2395	3018	3812
	0.842	0.461					2777	1698	3897	4338
	1.265	0.805					2905	2582	1269	2242
	0.887	0.849					1440	1339	1798	748
	1.058	0.836					3699	584	4872	3498
	0.962	0.908					1497	1593	2238	2009
	1.17	0.662					2032	1256	2348	4642
	0.844	0.58					1402	3549	3292	1617
	1.053	0.759					2675	2453	873	1622
	1.016	0.923					3508	2123	2293	2417
	1.058	0.907					2649	1587	2938	1378
	0.927	0.927					2939	1253	1949	1969
	1.283	1.135					2443	1449	2413	2273
	0.782	0.878					855	1933	3242	2310
							2545	2067	4046	2929
	unpaired two-tailed Student’s t test						2242	639	4085	2040
	n=16						3352	856	3621	2627
	p=0.001						1551	1215	2553	2275
	t=3,64, df=30						2246	1350	1348	2217
										2101
										1817
										1198
	sh-ctl	sh-TRa1	PSG5	TRa1			Kruskal-Wallis test
Figure 3G	3615	19146	878	1201			n=21, 21, 21, 24
	6680	36684	856	787			p=0.0071
	8406	14112	3473	632
	816	21001	1764	178
	10760	15561	3808	364
	14325	25573	1523	1126
	20147	14566	841	603
	18513	21390	1825	1141
	17109	16604	2590	594
	11339	23007	2013	1027
	18930	27178	1197
	23726	18036	1103
	13917	9802
	21360	9335
	17393
3G left	Unpaired two-tailed Student’s t test
	n=15-16
	p=0.039
	t=2.16
	df=27
3G right	Unpaired two-tailed Student’s t test
	n=10-12
	p=0.043
	t=0.043
	df=14
