# Supplementary material for: Transient hypothyroidism favors oligodendrocyte generation providing functional remyelination in the adult mouse brain
Source: eLife journal article supplement (doi:10.7554/elife.29996), 2017-09-06
Supplement: supp [file elife_poa_e29996_Figure_1_source_data_1.xlsx]

## Sheet: Feuil1
Hypothyroidism during demyelination favors oligodendrogenesis
	CTL	Eu CPZ	Hypo CPZ			CTL	Eu CPZ	Hypo CPZ
Figure 1C, left	11	15	37		Figure 1C, right	7.8	42	2.5
	8	18	25			0	24	7
	10	21	31			2.78	34	30
	15	25	27			0	28	9
	13	20	22				26	6
		21	22					11
	Kruskal-Wallis test					Kruskal-Wallis test
	n=5, 6, 6					n=4, 5, 6
	p=0,0015					p=0,0109
	CTL	Eu CPZ	Hypo CPZ
Figure 1E	0.27	0.081	0.33
	0.27	0.11	0.34
	0.26	0.06	0.31
	0.23	0.081	0.4
	0.27	0.11	0.32
	0.34	0.12	0.3
	0.39	0.15	0.24
	0.34	0.15	0.22
	0.32	0.2	0.25
	0.43	0.149	0.27
	0.46	0.21	0.21
	0.42	0.16	0.2
			0.23
			0.22
	one-way Anova
	n=12, 12, 14
	p<0,001
	t=7.952 (CTL vs EuCPZ)
	t=5.835 (EuCPZ vs HypoCPZ)
