# Supplementary material for: Transient hypothyroidism favors oligodendrocyte generation providing functional remyelination in the adult mouse brain
Source: eLife journal article supplement (doi:10.7554/elife.29996), 2017-09-06
Supplement: supp [file elife_poa_e29996_Figure_5_source_data_1.xlsx]

## Sheet: Feuil1
Cell-specific Dio3 expression in the adult SVZ.
	mitotic progenitors				OPCs
	sh-ctl	sh-dio3			sh-ctl	sh-dio3
Figure 4J	11	4		Figure 4K	85	50
	12	10			53	62
	9	10			80	63
	8	4			53	27
	8	3			60	46
	10	8			50	48
	7	4			70	10
		2			38	11
		4			35	17
		3			31	16
		1
		3
	Mann Whitney test				Unpaired two-tailed Student’s t test
	n=7,12				n=10
	p=0.0097				p=0.0325
					t=2.316
					df=18
