# Supplementary figures and images for: Transient hypothyroidism favors oligodendrocyte generation providing functional remyelination in the adult mouse brain
Source: eLife journal article supplement (doi:10.7554/elife.29996), 2017-09-06

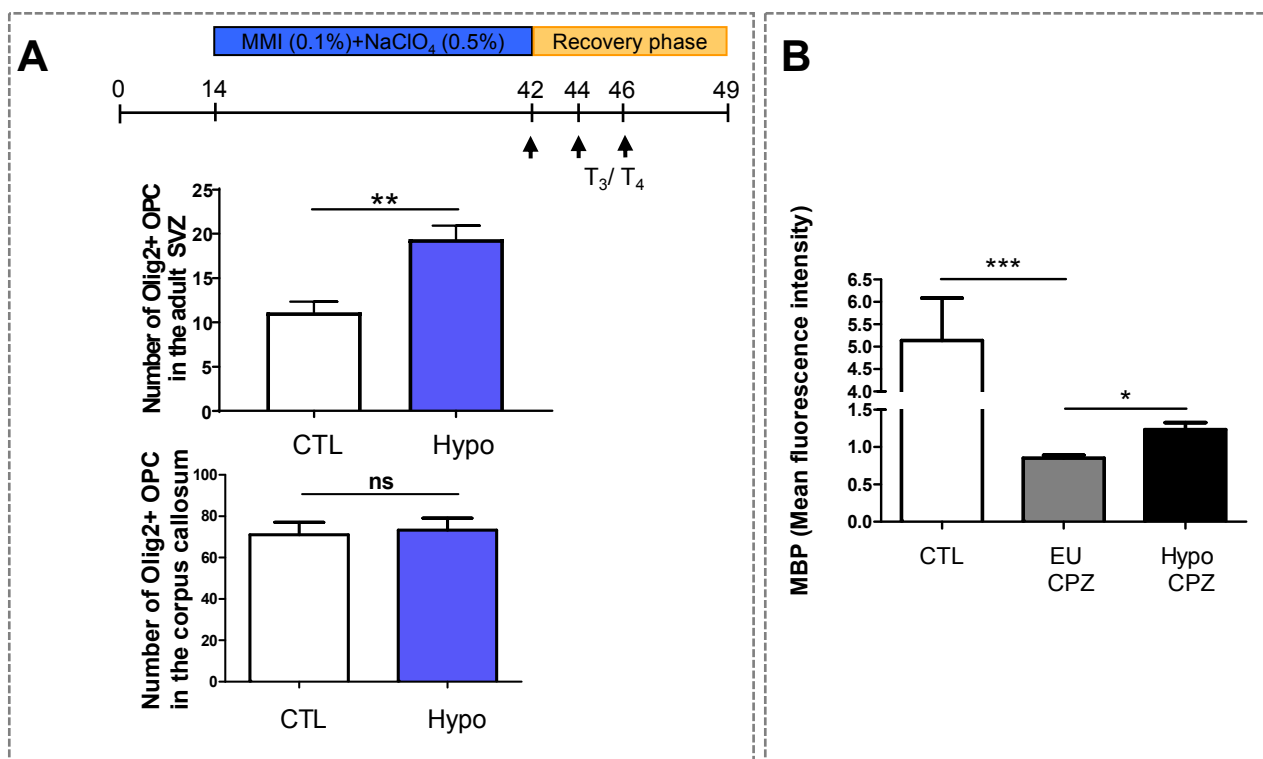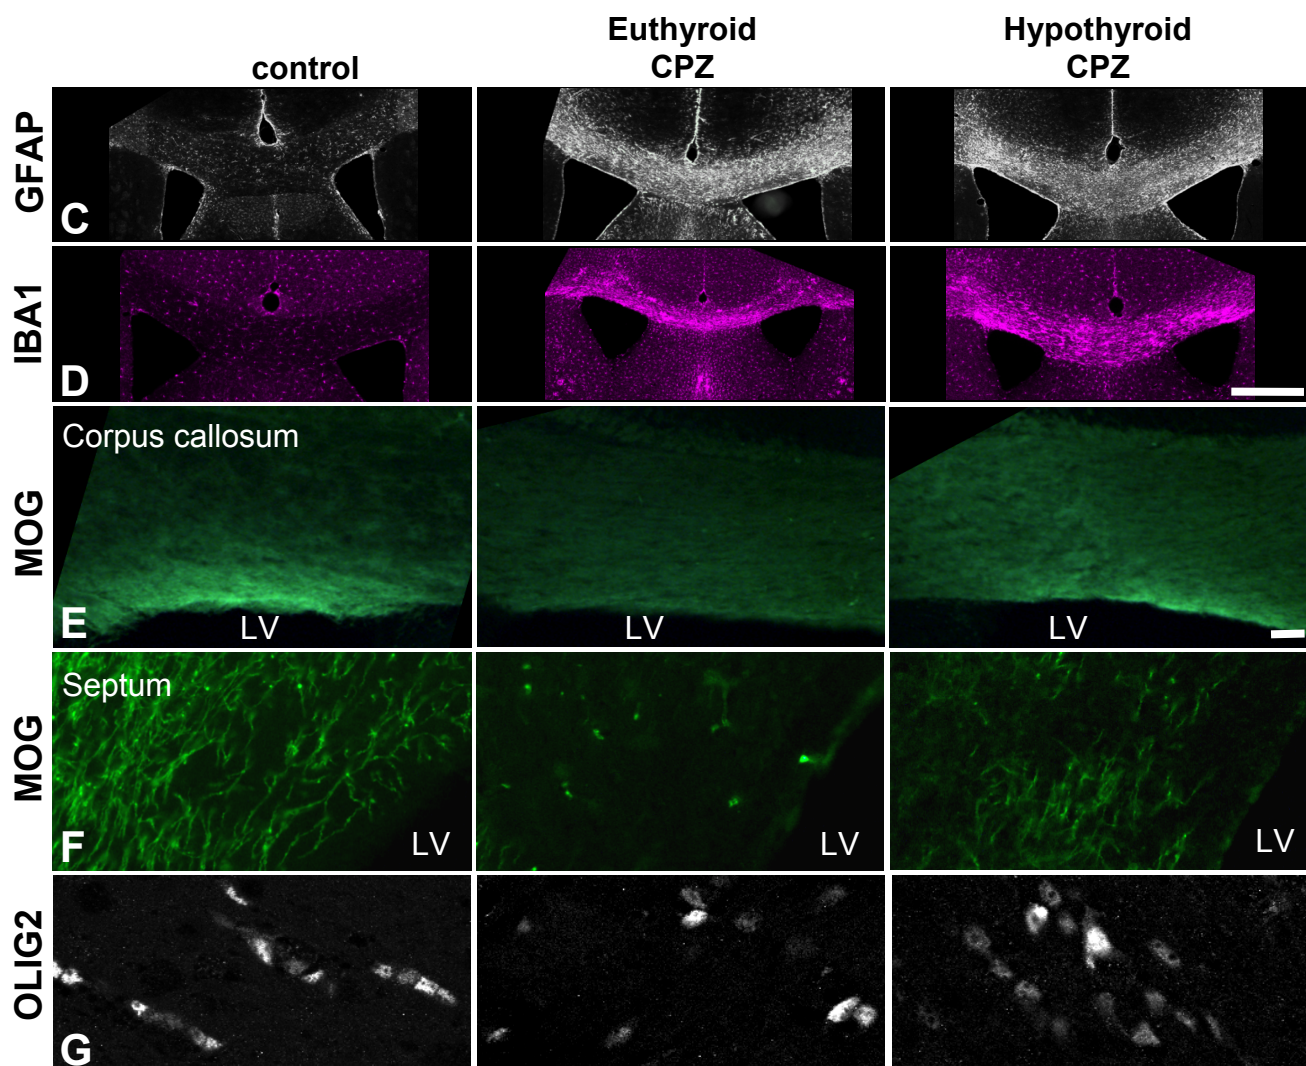

Figure 1 – figure supplement 1

Supplement: supp [file elife_poa_e29996_Figure_1_figure_Supplement_1.pdf › elife_poa_e29996_Figure_1_figure_Supplement_1.pdf]

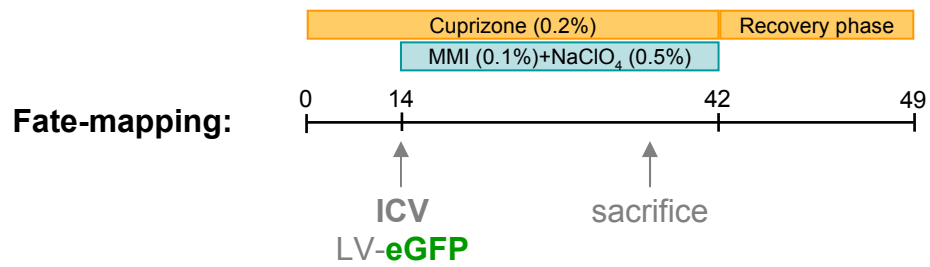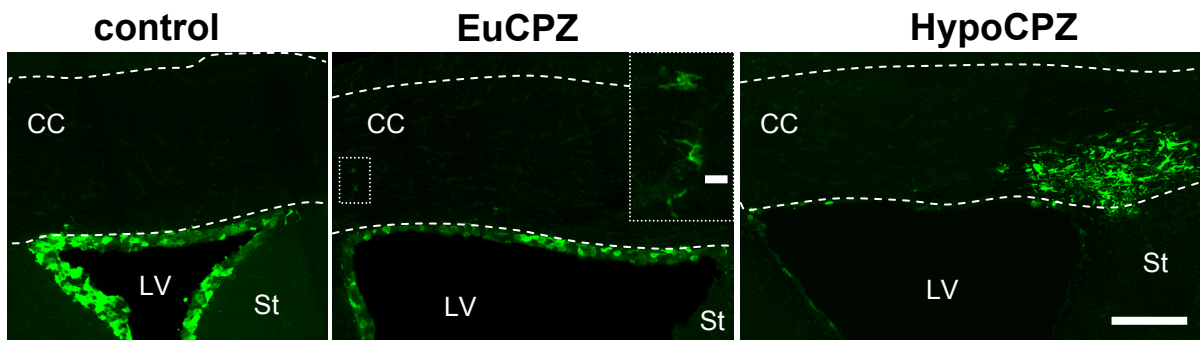

Figure 1 – figure supplement 2

Supplement: supp [file elife_poa_e29996_Figure_1_figure_supplement_2.pdf › elife_poa_e29996_Figure_1_figure_supplement_2.pdf]

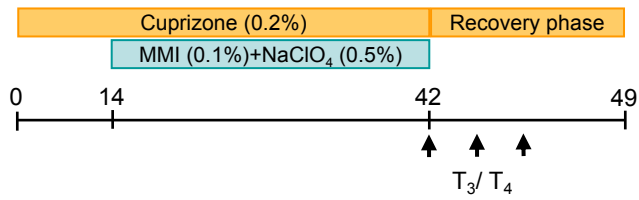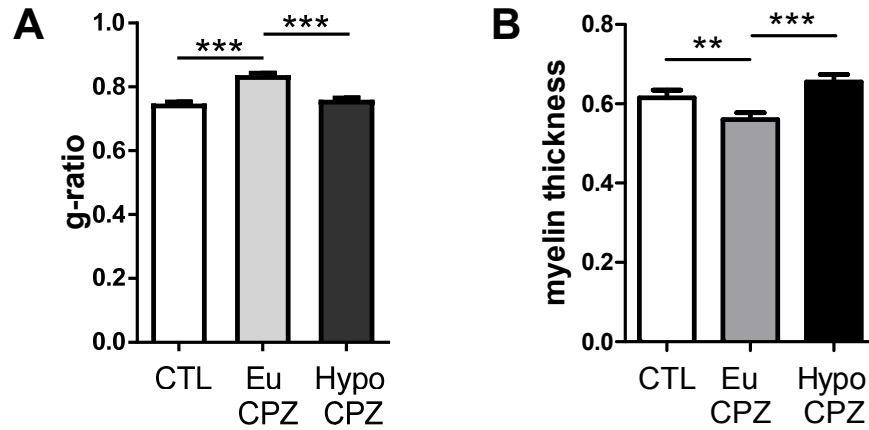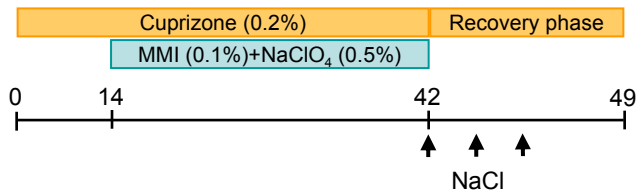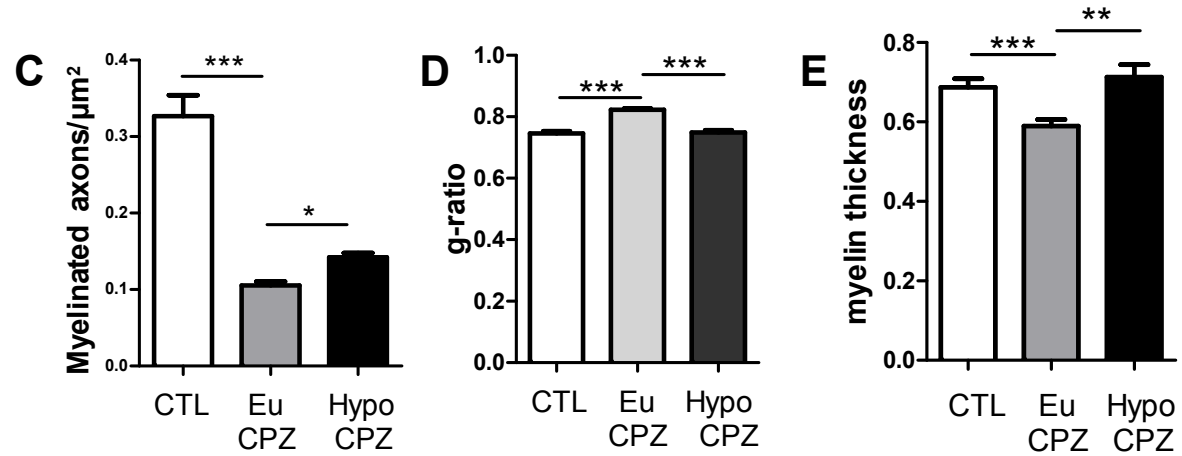

Figure 1 – figure supplement 3

Supplement: supp [file elife_poa_e29996_Figure_1_figure_supplement_3.pdf › elife_poa_e29996_Figure_1_figure_supplement_3.pdf]

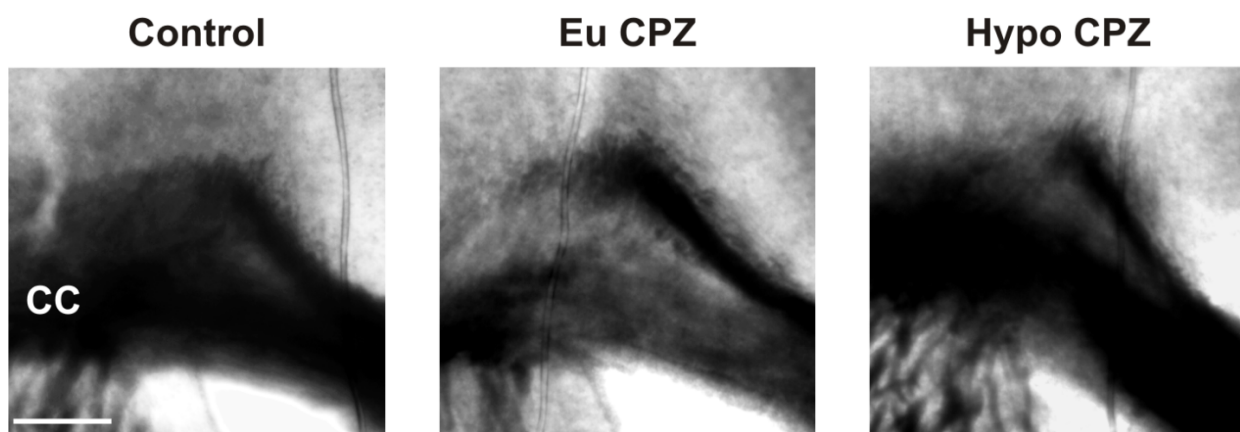

Figure 2 – figure supplement 1

Supplement: supp [file elife_poa_e29996_Figure_2_figure_supplement_1.pdf › elife_poa_e29996_Figure_2_figure_supplement_1.pdf]

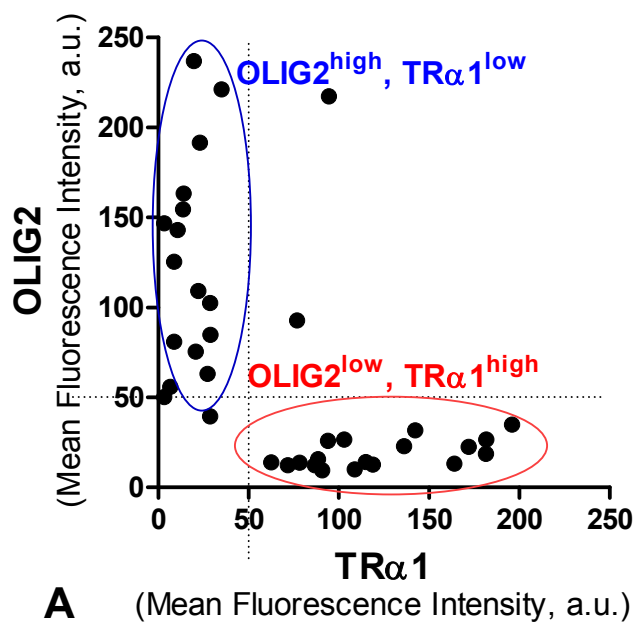

**A** (Mean Fluorescence Intensity, a.u.)

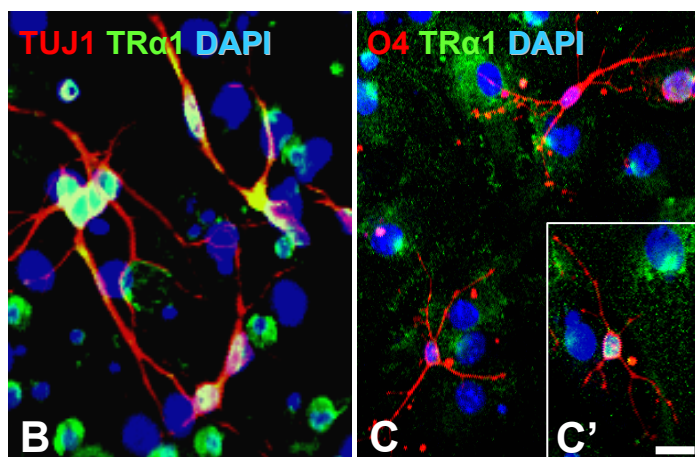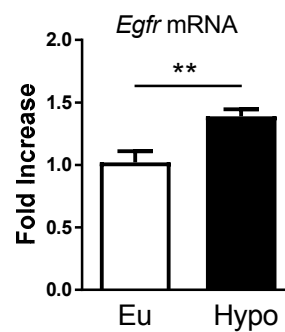

**D**

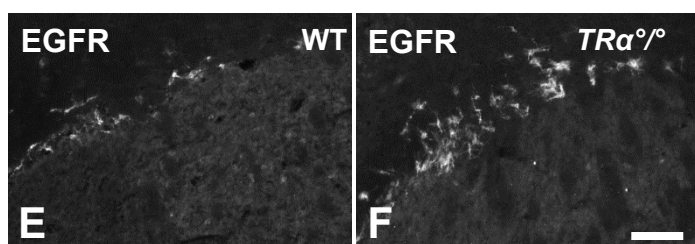

**G**

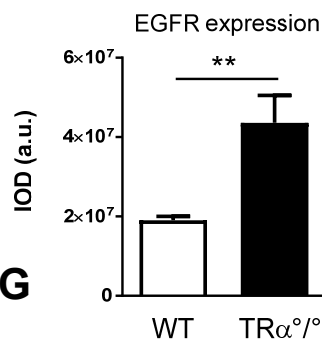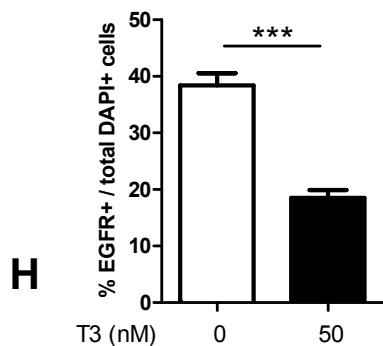

**H**

Figure 3 – figure supplement 1

Supplement: supp [file elife_poa_e29996_Figure_3_figure_supplement_1.pdf › elife_poa_e29996_Figure_3_figure_supplement_1.pdf]

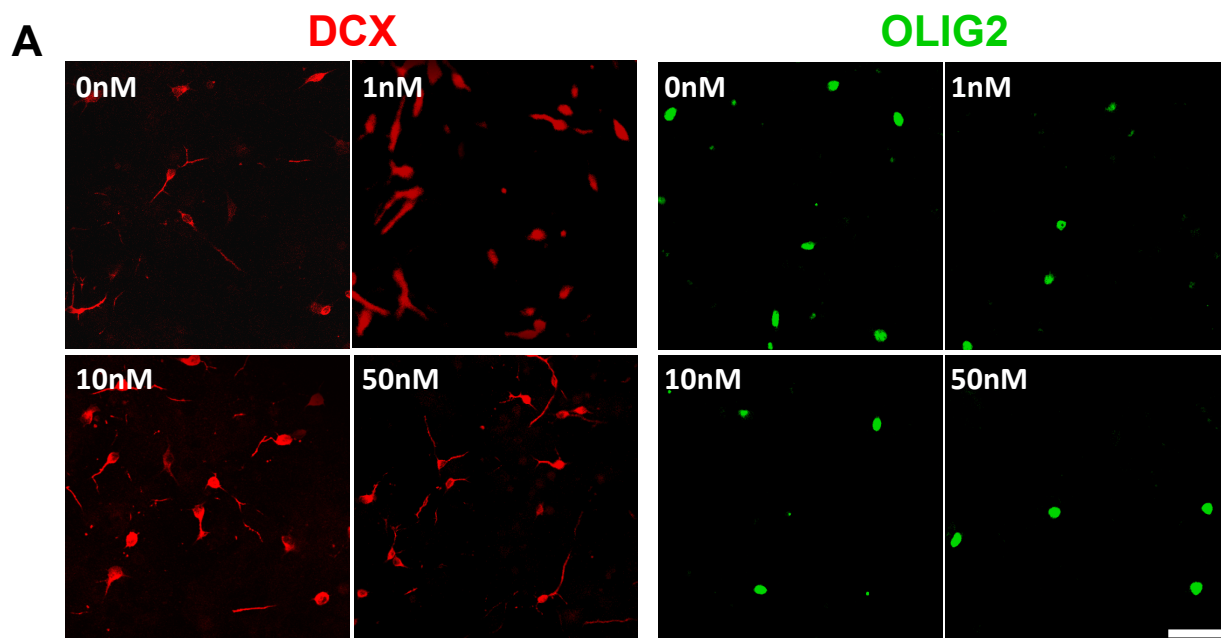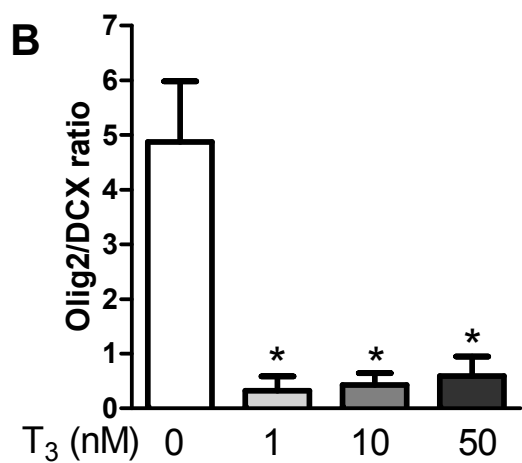

Figure 5 – figure supplement 2

Supplement: supp [file elife_poa_e29996_Figure_5_figure_supplement_2.pdf › elife_poa_e29996_Figure_5_figure_supplement_2.pdf]

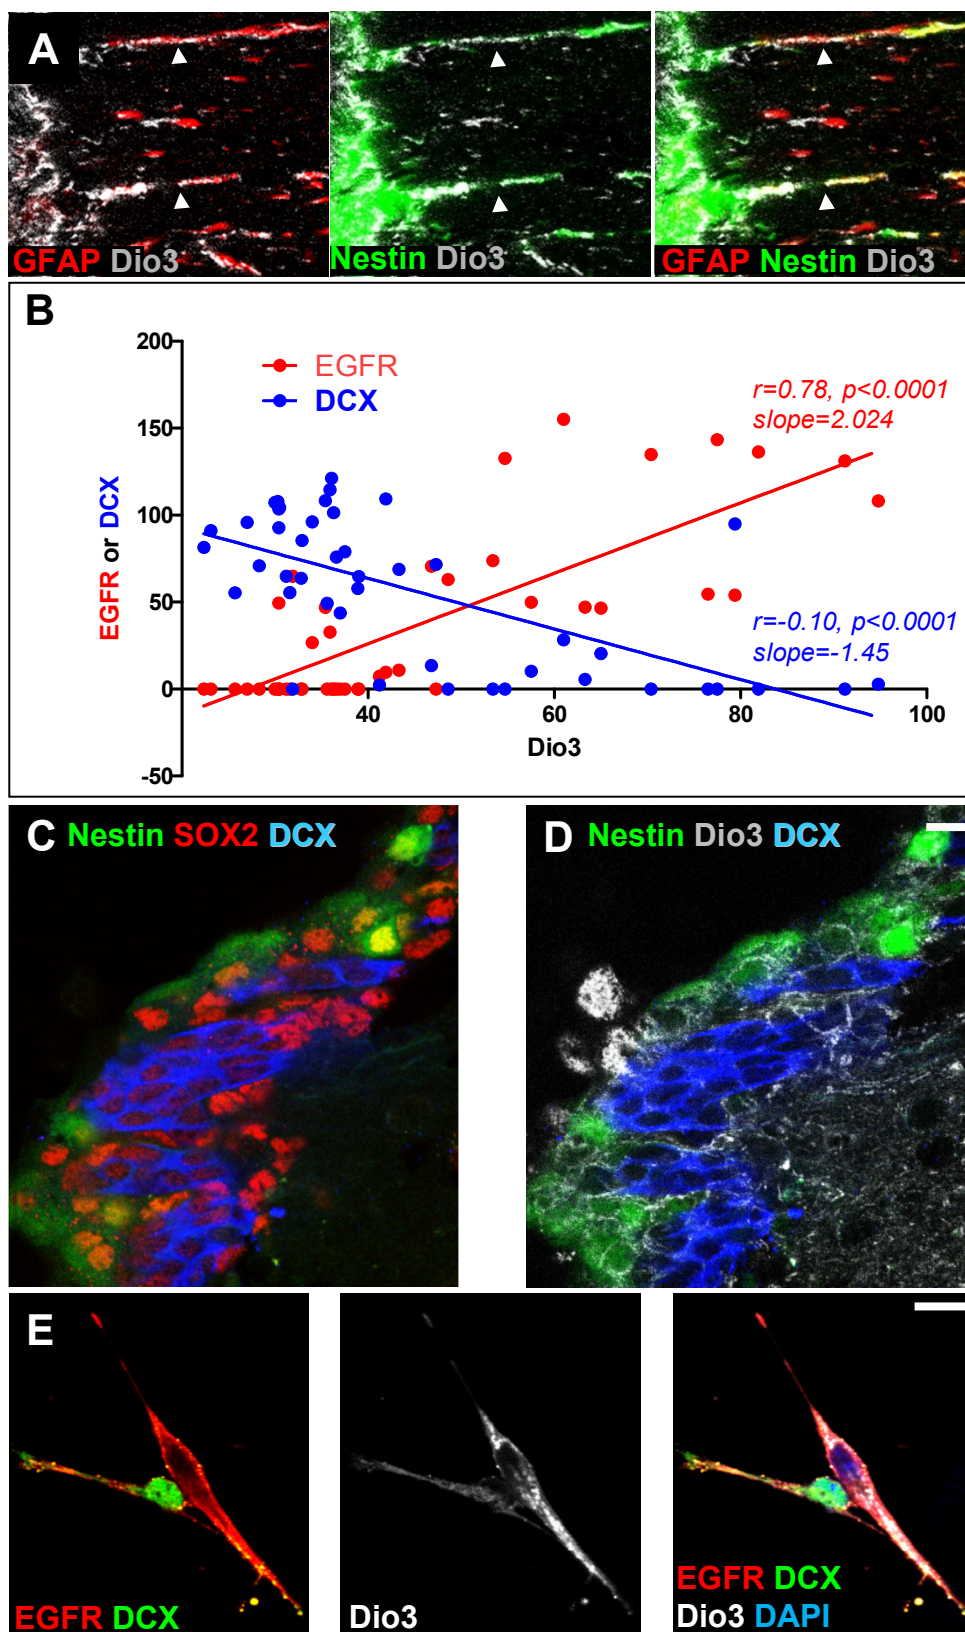

Figure 5 – figure supplement 1

Supplement: supp [file elife_poa_e29996_Figure_figure_supplement_1.pdf › elife_poa_e29996_Figure_figure_supplement_1.pdf]
